# Supplementary material for: Cryo-EM structure and regulation of human NAD kinase
Source: PubMed Central journal article supplement — Sci Adv. 2025 Jan 24;11(4):eads2664. doi: 10.1126/sciadv.ads2664 (PMC11759006; doi:10.1126/sciadv.ads2664), 2025-01-24
Supplement: sciadv.ads2664_sm.pdf [file sciadv.ads2664_sm.pdf]

Supplementary Materials for  
**Cryo-EM structure and regulation of human NAD kinase**

Prakash P. Praharaj *et al.*

Corresponding author: Gilles Labesse, [labesse@cbs.cnrs.fr](mailto:labesse@cbs.cnrs.fr); Gerta Hoxhaj, [gerta.hoxhaj@utsouthwestern.edu](mailto:gerta.hoxhaj@utsouthwestern.edu)

*Sci. Adv.* **11**, eads2664 (2025)  
DOI: 10.1126/sciadv.ads2664

**This PDF file includes:**

Table S1  
Figs. S1 to S11

**Table S1. Post-translational modifications of NADK expressed in HEK-293 cells.**

| Site          | Peptide Sequence                     | PhosphoPeptide modifications | Abundance of modification (10 <sup>6</sup> ) | Total peptide abundance (10 <sup>6</sup> ) | % modified peptide | Phosphosite® |
|---------------|--------------------------------------|------------------------------|----------------------------------------------|--------------------------------------------|--------------------|--------------|
| S15           | MTMNKESPDAAAYCCSACHGDETWSYNHPIR      | 1xPhospho [S8]               | 23.431                                       | 181.948                                    | 12.88              | 3HTP         |
| S15           | ELSPDAAAYCCSACHGDETWSYNHPIR          | 1xPhospho [S3]               | 350.63                                       | 6896.52                                    | 5.08               | 3HTP         |
| S15           | ELSPDAAAYCCSACHGDETWSYNHPIRGR        | 1xPhospho [S3]               | 37.426                                       | 1849.1                                     | 2.02               | 3HTP         |
| S15, S24      | ELSPDAAAYCCSACHGDETWSYNHPIR          | 2xPhospho [S3; S12]          | 0.184                                        | 6896.52                                    | 0.0027             |              |
| S44           | AKSRSLSPALGSTK                       | 1xPhospho [S3]               | ND                                           | 2.097                                      |                    | 10HTP        |
| S46           | SRSLSPALGSTKEFR                      | 1xPhospho [S3]               | 0.537                                        | 0.537                                      | 100                | 30HTP        |
| S46           | SRSLSPALGSTK                         | 1xPhospho [S3]               | 80.528                                       | 429.29                                     | 18.76              | 30HTP        |
| S44, S46      | AKSRSLSPALGSTK                       | 2xPhospho [S3; S5]           | 2.097                                        | 2.097                                      | 100                |              |
| S48           | SLSALGSTKEFR                         | 1xPhospho [S3]               | 3.161                                        | 93.74                                      | 3.37               | 37HTP        |
| S46; S48      | SRSLSPALGSTK                         | 2xPhospho [S3; S5]           | 103.22                                       | 429.29                                     | 24.04              |              |
| S48; S50      | SLSALGSTK                            | 2xPhospho [S3; S5]           | 64.916                                       | 12857.7                                    | 0.5                |              |
| S46; S48; S50 | SRSLSPALGSTK                         | 3xPhospho [S3; S5; S7]       | ND                                           | 429.29                                     |                    |              |
| S64           | TRSLHGPCPVTTFGPKACVLQNPQTIMHIQDPASQR | 1xPhospho [S3]               | 0.94                                         | 5.224                                      | 17.99              | 44HTP        |
| S64           | TRSLHGPCPVTTFGPK                     | 1xPhospho [S3]               | 550.51                                       | 554.56                                     | 99.27              | 44HTP        |
| S64           | SLHGPCPVTTFGPK                       | 1xPhospho [S1]               | 145.59                                       | 20746                                      | 0.702              | 44HTP        |
| T62; S64; T/S | TRSLHGPCPVTTFGPKACVLQNPQTIMHIQDPASQR | 3xPhospho [T1; S3; T/S]      | 0.96                                         | 5.224                                      | 18.378             |              |
| S117          | MRDASLLQPFK                          | 1xPhospho [S5]               | 29.61                                        | 2227.72                                    | 1.33               |              |
| S117          | DASLLQPFK                            | 1xPhospho [S3]               | 49.97                                        | 18432.1                                    | 0.27               |              |
| S117          | DASLLQPFKELCTHLMEEENMIVYVEK          | 1xPhospho [S3]               | 2.64                                         | 869.8                                      | 0.3                |              |
| S153          | KVLEDPAIASDESFGAVK                   | 1xPhospho [S13]              | ND                                           | 5316.8                                     |                    |              |
| S153          | VLEDPAIASDESFGAVK                    | 1xPhospho [S12]              | ND                                           | 23471.5                                    |                    |              |
| S371          | IMLSPEAR                             | 1xPhospho [S4]               | 10.15                                        | 21843.4                                    | 0.05               |              |
| S395          | HGDSISITTSCYPLPSICVR                 | 1xPhospho [S4]               | 2.0                                          | 5930.09                                    | 0.03               |              |

| Site                   | Peptide Sequence                     | Methylation events                    | Abundance of modification (10 <sup>6</sup> ) | Total peptide abundance (10 <sup>6</sup> ) | % modified peptide | Phosphosite® |
|------------------------|--------------------------------------|---------------------------------------|----------------------------------------------|--------------------------------------------|--------------------|--------------|
| K12                    | MTMNKELSPDAAAYCCSACHGDETWSYNHPIR     | 1xTrimethyl [K5]                      | 77.5                                         | 181.948                                    | 42.59              |              |
| K12                    | MTMNKELSPDAAAYCCSACHGDETWSYNHPIR     | 1xDimethyl [K5]                       | ND                                           | 181.948                                    |                    |              |
| K12, T9                | MTMNKELSPDAAAYCCSACHGDETWSYNHPIR     | 1xDimethyl [K5];<br>1xPhospho [T2]    | ND                                           | 181.948                                    |                    |              |
| R39                    | ELSPDAAAYCCSACHGDETWSYNHPIRGRAK      | 1xDimethyl [R27]                      | 4.52                                         | 4.52                                       | 100                | 3HTP         |
| R41                    | ELSPDAAAYCCSACHGDETWSYNHPIRGRAK      | 1xTrimethyl [R29]                     | 1.74                                         | 1.74                                       | 100                | 5HTP         |
| K43                    | AKSRSLASPALGSTK                      | 1xTrimethyl [K2]                      | ND                                           | 2.097                                      |                    |              |
| R45                    | AKSRSLASPALGSTK                      | 1xDimethyl [R4]                       | ND                                           | 2.097                                      |                    |              |
| R45                    | SRSLASPALGSTK                        | 1xMethyl [R2]                         | 182.34                                       | 429.29                                     | 42.48              | 1HTP         |
| R45                    | SRSLASPALGSTK                        | 1xDimethyl [R2]                       | 44.709                                       | 429.29                                     | 10.41              | 1HTP         |
| K57                    | SLSASPALGSTKEFR                      | 1xMethyl [K12]                        | 1.176                                        | 12857.7                                    | 0.01               |              |
| K77                    | TRSLHGPCPVTTFGPKACVLQNPQTIMHIQDPASQR | 1xTrimethyl [K16];<br>1xPhospho [T/S] | ND                                           | 5.224                                      |                    |              |
| K77                    | SLHGPCPVTTFGPKACVLQNPQTIMHIQDPASQR   | 1xDimethyl [K14]                      | 17.75                                        | 408.04                                     | 4.35               |              |
| K77                    | SLHGPCPVTTFGPKACVLQNPQTIMHIQDPASQR   | 1xTrimethyl [K14]                     | 93.71                                        | 408.04                                     | 22.97              |              |
| R97                    | ACVLQNPQTIMHIQDPASQR                 | 1xDimethyl [R20]                      | ND                                           | 26137.2                                    |                    |              |
| K123                   | DASLLQPFKELCTHLMEEENMIVYVEK          | 1xTrimethyl [K9]                      | ND                                           | 869.8                                      |                    |              |
| K140                   | ELCTHLMEEENMIVYVEK                   | 1xDimethyl [K17]                      | ND                                           | 15711.6                                    |                    |              |
| K141                   | KVLEDPAIASDESFGAVK                   | 1xMethyl [K1]                         | 116.68                                       | 5316.8                                     | 2.19               |              |
| K141                   | KVLEDPAIASDESFGAVK                   | 1xTrimethyl [K1]                      | 2.245                                        | 5316.8                                     | 0.04               |              |
| K141                   | KVLEDPAIASDESFGAVKK                  | 1xMethyl [K1]                         | 4.53                                         | 743.82                                     | 0.61               |              |
| K141                   | KVLEDPAIASDESFGAVKK                  | 1xDimethyl [K1]                       | ND                                           | 743.82                                     |                    |              |
| K158                   | VLEDPAIASDESFGAVK                    | 1xMethyl [K17]                        | 121.53                                       | 23471.5                                    | 0.52               |              |
| K158                   | VLEDPAIASDESFGAVKK                   | 1xTrimethyl [K17]                     | 5.74                                         | 3100.82                                    | 0.19               |              |
| K158                   | VLEDPAIASDESFGAVKK                   | 1xMethyl [K17]                        | 6.39                                         | 3100.82                                    | 0.21               |              |
| K158;<br>K159;<br>K160 | KVLEDPAIASDESFGAVKKK                 | 3xMethyl [K18; K19;<br>K20]           | ND                                           | 6.16                                       |                    |              |

|             |                                       |                                |                                                   |                                                 |                           |                     |
|-------------|---------------------------------------|--------------------------------|---------------------------------------------------|-------------------------------------------------|---------------------------|---------------------|
| R290        | QAMQYQVLNEVVIDR                       | 1xMethyl [R15]                 | 4.69                                              | 8198.9                                          | 0.06                      |                     |
| <b>Site</b> | <b>Peptide Sequence</b>               | <b>Acetylation events</b>      | <b>Abundance of modification (10<sup>6</sup>)</b> | <b>Total peptide abundance (10<sup>6</sup>)</b> | <b>% modified peptide</b> | <b>Phosphosite®</b> |
| K12         | MTMNKESPDAAAYCCSACHGDETWSYNHPIR       | 1xAcetyl [K5]                  | 79.445                                            | 181.948                                         | 43.66                     |                     |
| K43         | AKSRSLSPALGSTK                        | 1xAcetyl [K2]                  | ND                                                | 2.097                                           |                           |                     |
| K57         | SLSASPALGSTK                          | 1xAcetyl [K12]                 | 9.69                                              | 12857.7                                         | 0.08                      | 2HTP                |
| K77         | SLHGPCPVTTFGPKACVLQNPQTIMHIQDPA SQR   | 1xAcetyl [K14]                 | 61.67                                             | 408.04                                          | 15.11                     |                     |
| T62;<br>K77 | TRSLHGPCPVTTFGPKACVLQNPQTIMHIQD PASQR | 1xPhospho [T1]; 1xAcetyl [K16] | 3.324                                             | 5.224                                           | 63.623                    |                     |
| S64;<br>K77 | TRSLHGPCPVTTFGPKACVLQNPQTIMHIQD PASQR | 1xPhospho [S3]; 1xAcetyl [K16] | ND                                                | 5.224                                           |                           |                     |
| K102        | LTWnkSPK                              | 1xAcetyl [K5]                  | 42.51                                             | 154.7                                           | 27.48                     |                     |
| K105        | SPKSVLVIK                             | 1xAcetyl [K3]                  | 71.54                                             | 191.56                                          | 37.35                     |                     |
| K111        | SVLVIKK                               | 1xAcetyl [K6]                  | 64.42                                             | 64.42                                           | 100                       |                     |
| K140        | ELCTHLMEEENMIVYVEKK                   | 1xAcetyl [K17]                 | 6.64                                              | 259.07                                          | 2.56                      |                     |
| K141        | KVLEDPAIASDESFGAVK                    | 1xAcetyl [K1]                  | 20.94                                             | 5316.8                                          | 0.39                      |                     |
| K158        | KVLEDPAIASDESFGAVKK                   | 1xAcetyl [K18]                 | 14.35                                             | 743.82                                          | 1.93                      | 1HTP                |
| K158        | VLEDPAIASDESFGAVK                     | 1xAcetyl [K17]                 | 3.79                                              | 23471.5                                         | 0.02                      | 1HTP                |
| K158        | VLEDPAIASDESFGAVKK                    | 1xAcetyl [K17]                 | 27.38                                             | 3100.82                                         | 0.88                      | 1HTP                |
| K158        | VLEDPAIASDESFGAVKK                    | 1xMethyl [K17]                 | 6.39                                              | 3100.82                                         | 0.21                      | 1HTP                |



**Fig. S1. Comparative sequence alignment and phylogenetic analysis of NADKs.**

(A) Sequence alignment of NADKs. A multiple sequence alignment shown of cytosolic NADKs from representative animals (human: nadk\_human, Xenopus: nadk\_xenle, zebrafish: nadk\_danre, drosophila: nadk\_drome and sea urchin: nadk\_strpu), alongside the mitochondrial NADK from yeast (pos5\_yeast) and from a bacterial pathogen, *Pseudomonas aeruginosa* (nadk\_pseae). The catalytic aspartate is highlighted with a black star, and the functionally important residues from the C-tail (this study) are shown in black circle. The figure was generated using Esript (<https://esript.ibcp.fr/ESPrpt/ESPrpt/>).

(B) Evolution of NADKs. A phylogenetic tree of various NADKs was built using the software Ibis2Analyzer (<http://ibis2analyzer.lcqb.upmc.fr/>). Cytosolic NADKs from animals appear more closely related to those NADKs from gram (-) bacteria, than the human mitochondrial NADK2 (nadk2\_human).

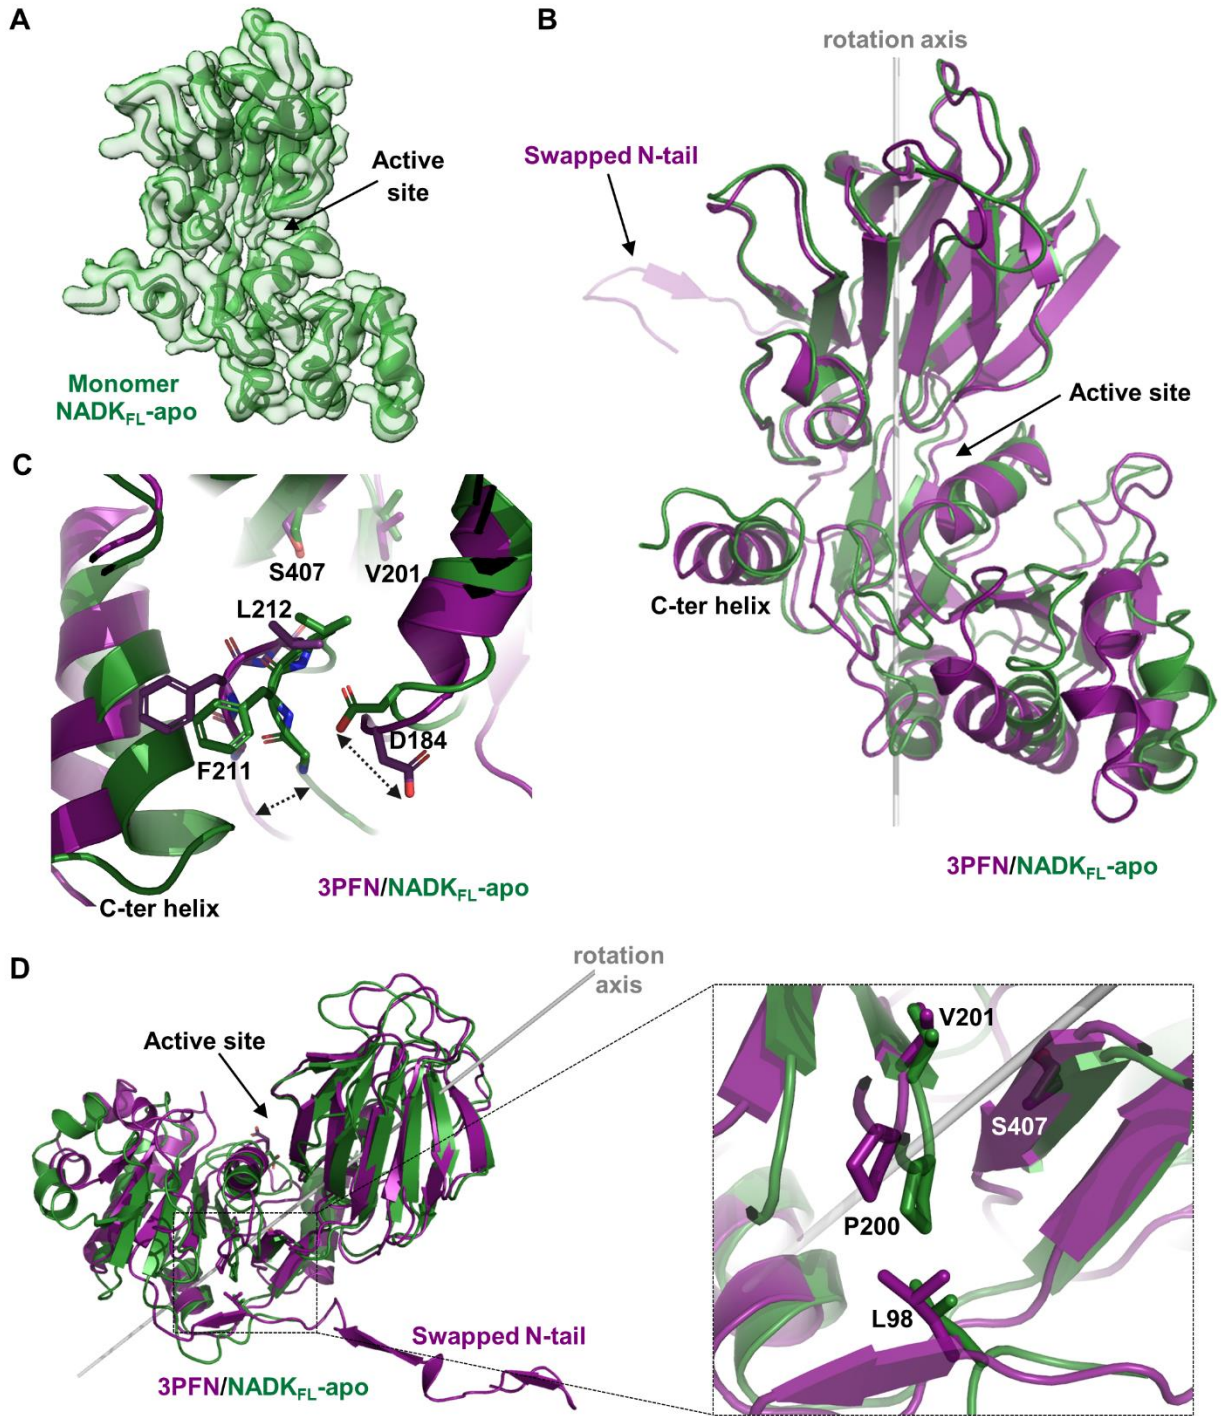

**Figure S2: Comparative analysis of the cryo-EM full-length NADK<sub>FL</sub> and crystal structure of a truncated hsNADK**

(A) Electron density and molecular model of a monomer of apo NADK<sub>FL</sub>.

(B) Comparison of apo NADK<sub>FL</sub> cryo-EM monomer in green and that of the crystal structure of a truncated construct of hsNADK (PDB3PFN) in violet. The main rotation axis is shown in light grey.

(C) Comparison of the active sites of apo NADK<sub>FL</sub> and the crystal structure 3PFN. Zoom of the core of the catalytic domains showing the positions of the two pivots, namely V201 and S407, and two highly conserved residues, F211 and L212. The re-orientation of the catalytic aspartate D184 and its interactions with the backbone nitrogens of F211 and L212 are shown. Same color code as in (B).

(D) Interaction network connecting the N-tail (especially L98) and the hinge pivots (V201 and S407) through proline P200 in hsNADK (3PFN) and NADK<sub>FL</sub> cryo-EM structure (color coded as in B). Panels B-D were drawn using PyMOL.



**A**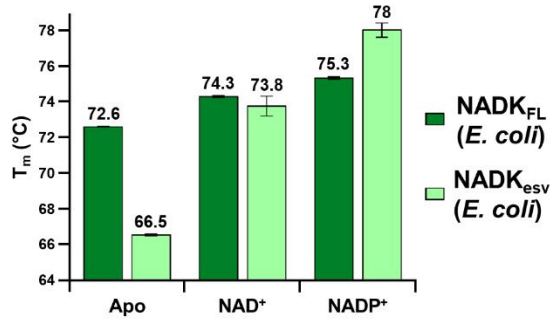**B**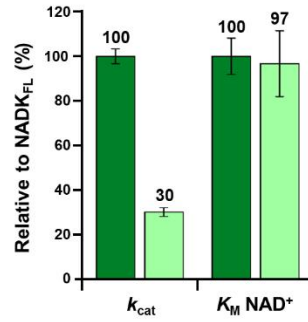**C**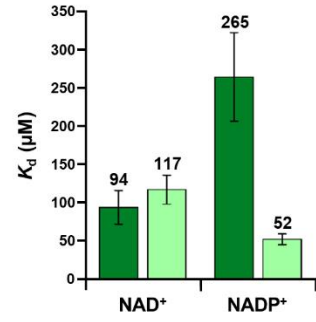**D**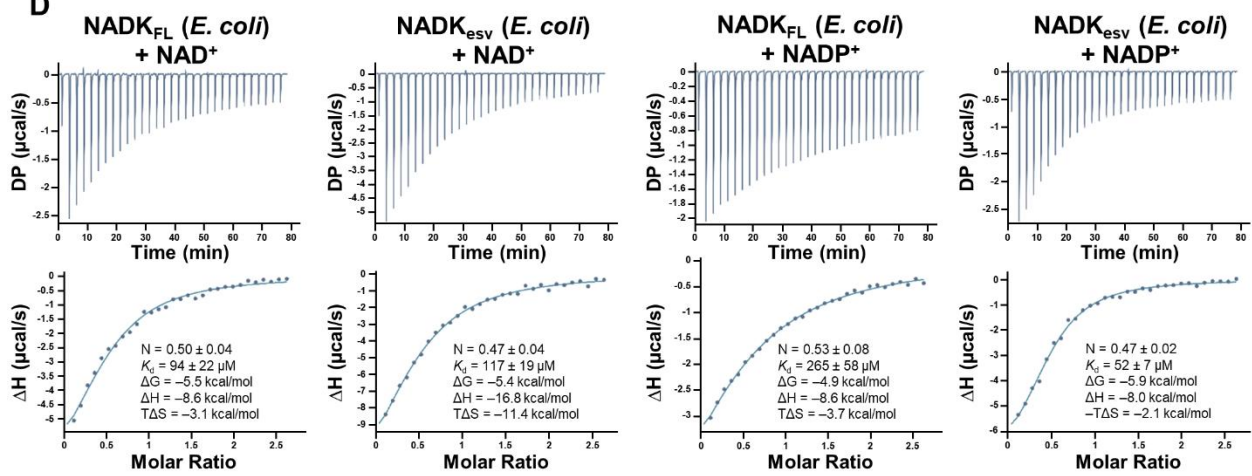**E**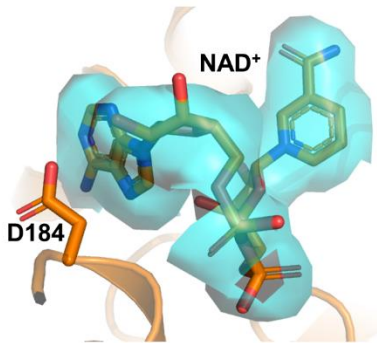**F**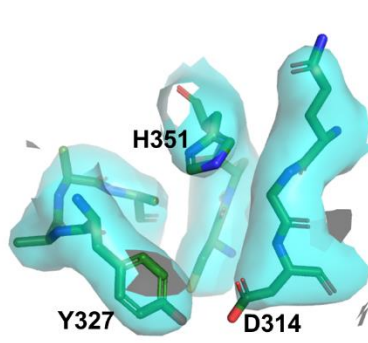**G**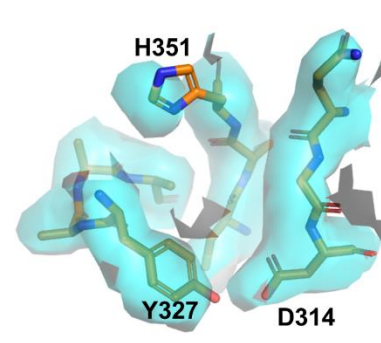

### Figure S3: Biochemical characterization of hsNADK

(A) Thermal stability of NADK<sub>FL</sub> (dark green) and NADK<sub>esv</sub> (light green) in its apo form and in complex with NAD<sup>+</sup> or NADP<sup>+</sup>.

(B) Relative kinetic parameters, steady state rate constant and Michaelis constant of NADK<sub>esv</sub> compared to NADK<sub>FL</sub> for NAD<sup>+</sup> (color code as in A).

(C) Dissociation constants of NAD<sup>+</sup> or NADP<sup>+</sup> from NADK<sub>FL</sub> and NADK<sub>esv</sub> (color code as in A).

(D) ITC isotherms for the binding of NAD<sup>+</sup> and NADP<sup>+</sup> to NADK<sub>FL</sub> or NADK<sub>esv</sub> are shown. Values deduced from the isotherms are displayed under each curve.

(E) The electron density for the NAD<sup>+</sup> molecule bound to NADK<sub>esv</sub> is shown in cyan surface. The ligand and the side chain of D184 are shown in sticks.

(F) Electron density and model of the active site around histidine H351 in the apo-form of NADK<sub>FL</sub>. The electron density is shown in cyan surface, and protein residues are shown in dark green sticks.

(G) Electron density and model of the active site around histidine H351 in the NAD<sup>+</sup>-bound form of NADK<sub>esv</sub>. The electron density is shown in cyan surface, and protein residues are shown in orange sticks.

**A**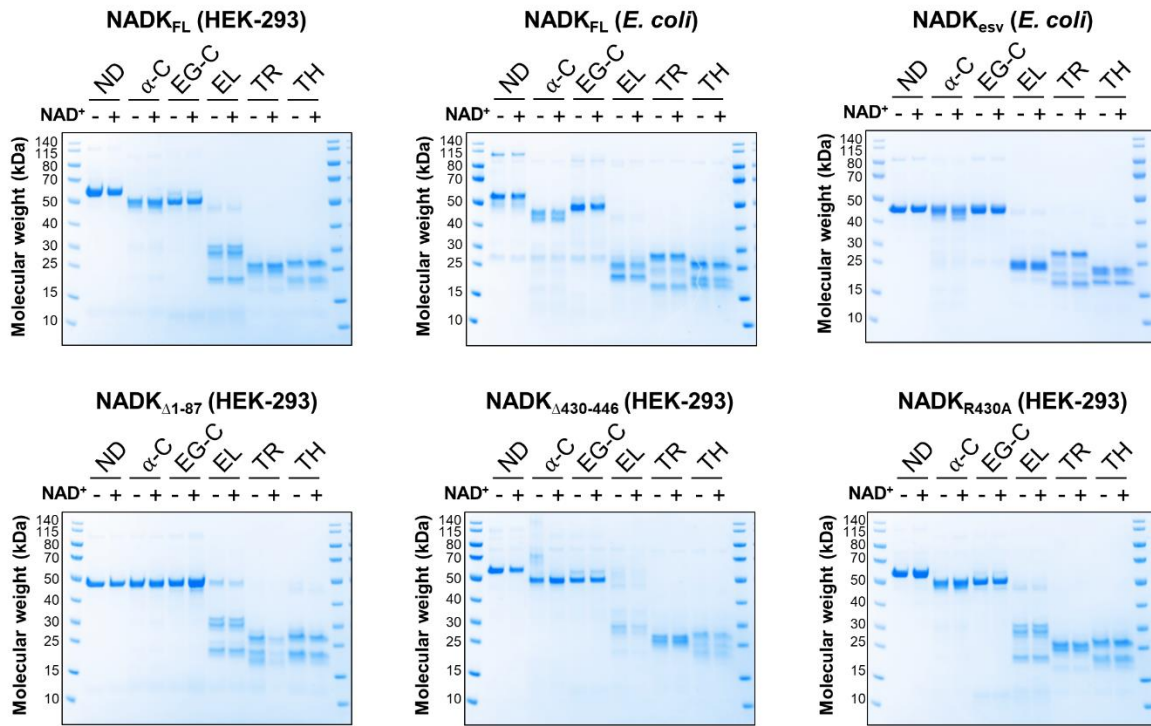**B**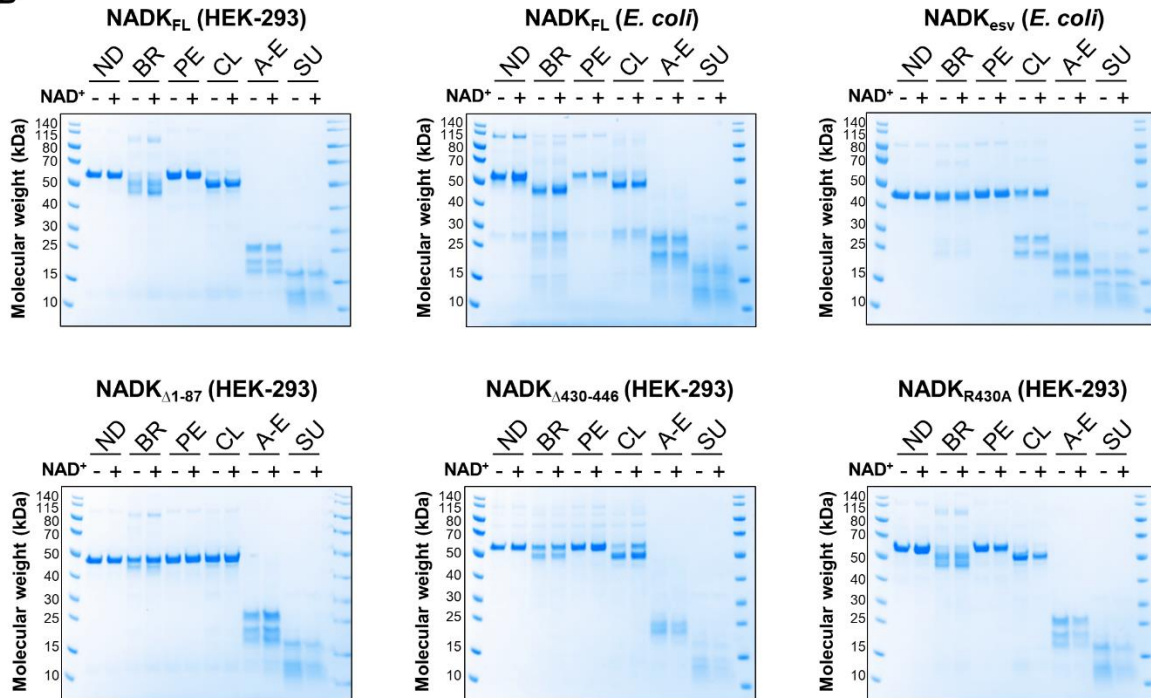

**Figure S4: Proteolysis profiles of various hsNADK constructs.**

(A, B) A panel of diluted proteases was used to partially digest (1 hour) different hsNADK constructs (purified from mammalian cells or bacteria), followed by analysis with SDS-PAGE gels. Constructs labeled as described in the text: NADK<sub>FL</sub> (HEK-293), NADK<sub>FL</sub> (*E. coli*), NADK<sub>esv</sub> (*E. coli*), NADK<sub>Δ1-87</sub> (HEK-293), NADK<sub>Δ430-446</sub> (HEK-293), and NADK<sub>R430A</sub> (HEK-293) were treated with the indicated proteases. Proteases used include ND = Not Digested, α-C = α-Chymotrypsin, EG-C = Endoproteinase Glu-C, EL = Elastase, TR = Trypsin, TH = Thermolysin Br = Bromelain, PE = Pepsin, CL = Clostripain, A-E = Actinase-E, SU = Subtilisin.

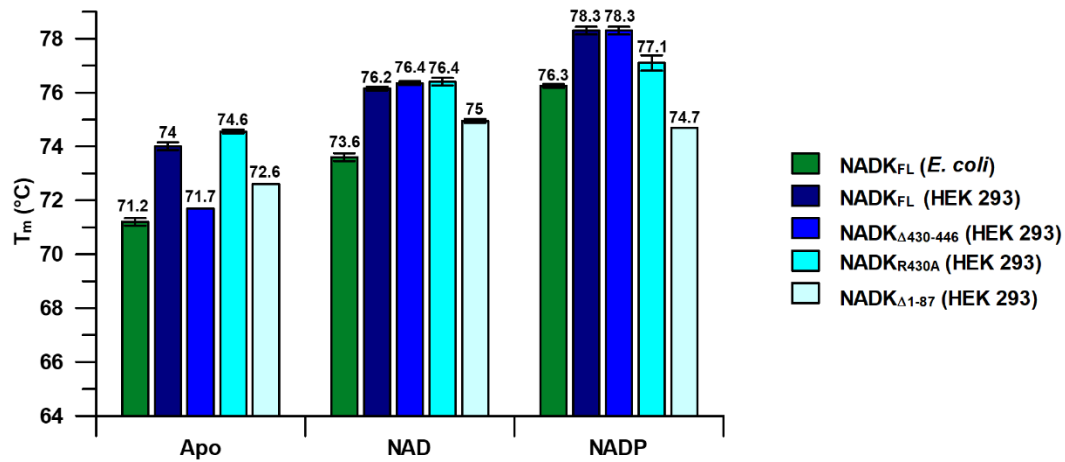

**Figure S5: Thermal stability of various hsNADK constructs.**

The thermostability of NADK<sub>FL</sub> purified from bacteria (dark green) and HEK-293 cells (dark blue) is compared with that of several hsNADK<sub>FL</sub> mutants purified from HEK-293 cells, both in the absence and presence of ligands (NAD<sup>+</sup> or NADP<sup>+</sup>).

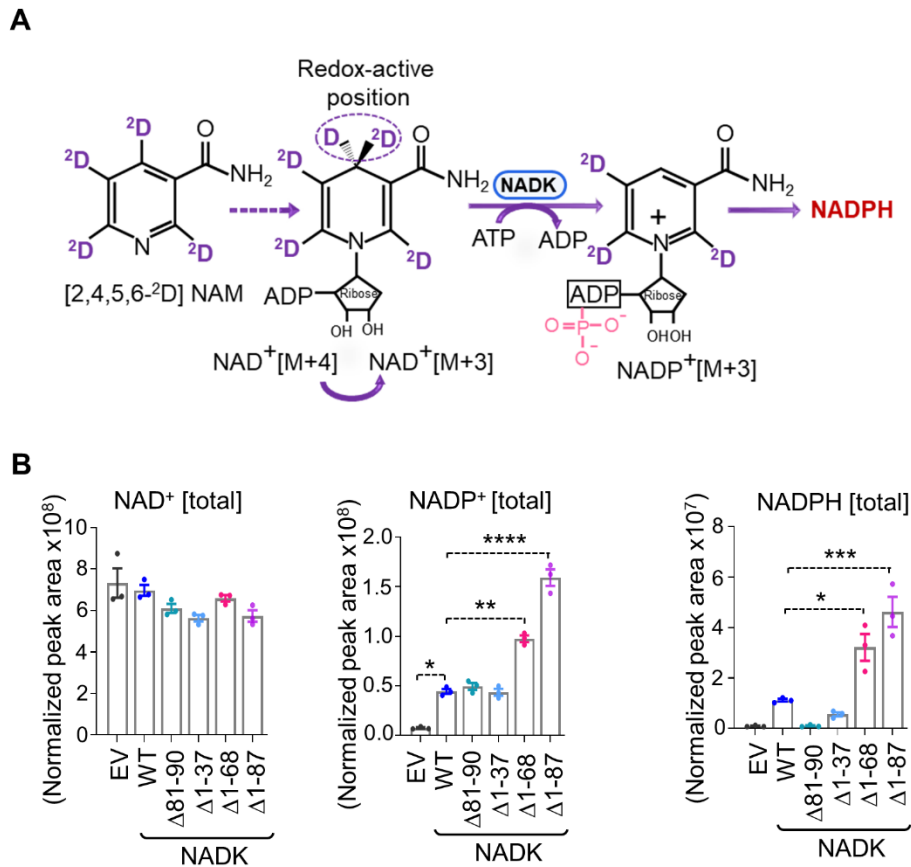

**Fig. S6. Impact of the N-terminal deletions on cellular NAD(P)(H) pools.**

(A) Schematics of labeling of NAD<sup>+</sup> and NADP<sup>+</sup> from <sup>2</sup>D<sub>4</sub>-nicotinamide. Redox-active positions are indicated.

(B) Normalized peak areas showing total NAD<sup>+</sup>, NADP<sup>+</sup>, and NADPH pools from NADK-deficient HEK-293 cells expressing either empty vector (EV) or the indicated NADK variants (WT, Δ1-37, Δ1-68, Δ1-87, Δ81-90, and ISO3). All the data are shown as the mean ± S.E.M. of biological triplicates from at least two independent experiments. \*p < 0.05, \*\*p < 0.01, \*\*\*p < 0.001, \*\*\*\*p < 0.0001 were calculated with one-way ANOVA and Sidak Post-hoc test.

**A**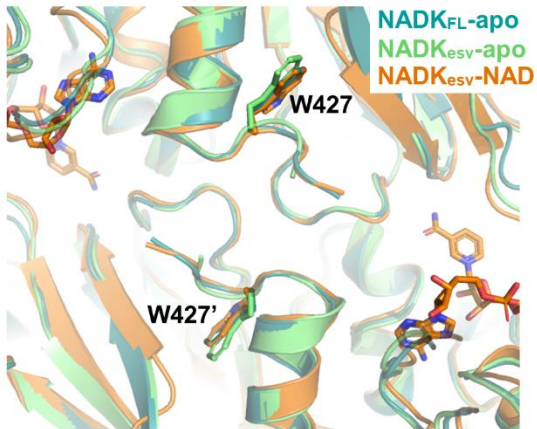**B**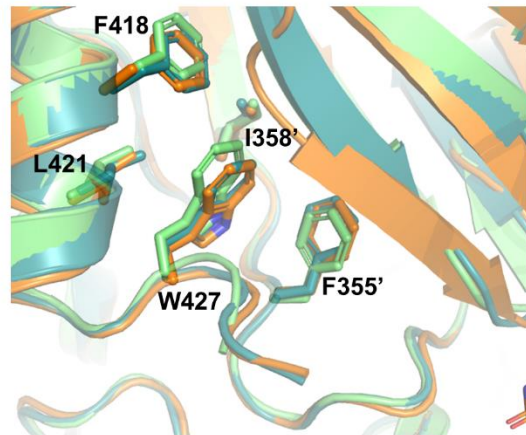**C**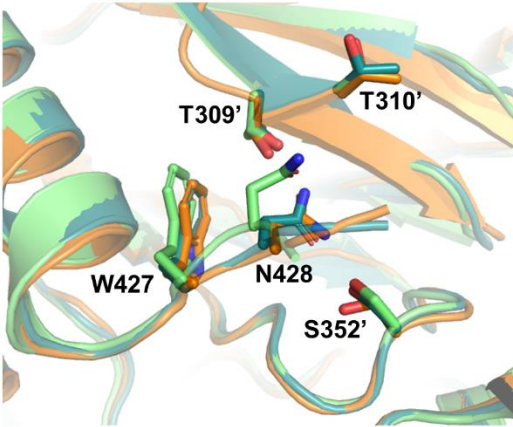**D**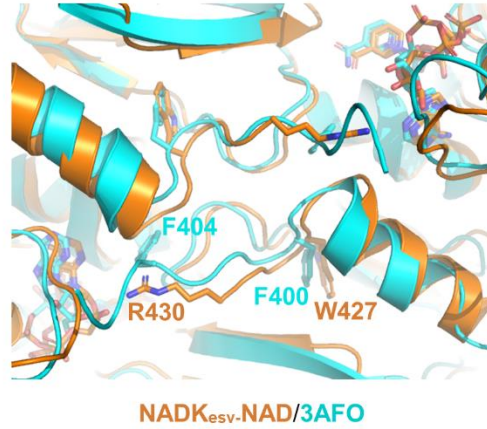**E**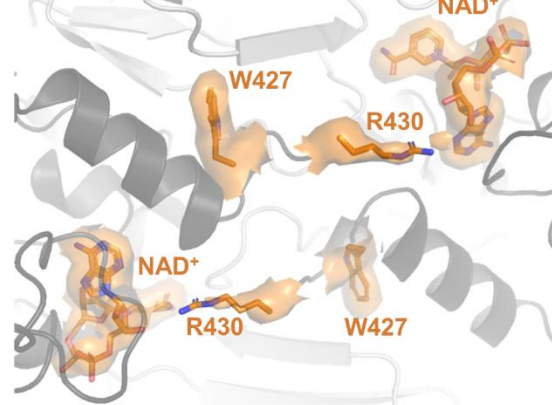**F**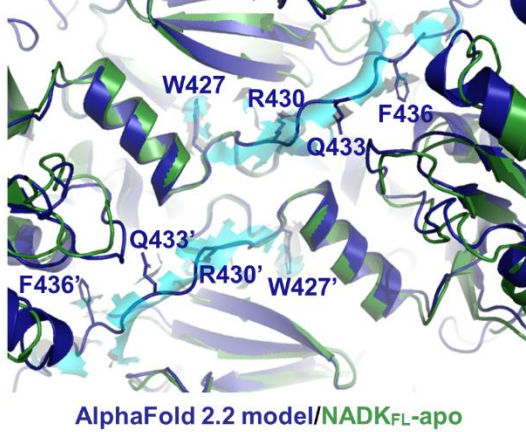

### Figure S7. Structural analysis of the C-terminal tail of NADK

(A) Zoom in the C-terminal region of the hsNADK. Comparison of the three cryo-EM structures: hsNADK<sub>FL</sub>-apo (teal), hsNADK<sub>esv</sub>-apo (green), and hsNADK<sub>esv</sub>-NAD<sup>+</sup> (orange). These structures highlight the positioning of a conserved and functionally important tryptophan W427 relative to the binding site of NAD<sup>+</sup>.

(B) Zoom in the cryo-EM structures of hsNADK. Side-chains of hydrophobic residues (F418, L421 from one monomer and F355' and I358' from a second monomer) in contact with the tryptophan W427 are shown in stick, while the remaining of the structure is shown as ribbons.

(C) Zoom in the cryo-EM structures of hsNADK. Side-chains of the conserved asparagine N428 (following W427) and those of the interacting residues (T309', T310' and S352' from a second monomer) are shown in stick, while the remaining of the structure is shown as ribbons.

(D) Comparison of the C-termini of hsNADK and yeast POS5 (PDB3AFO). The NAD<sup>+</sup>-bound structure of hsNADK<sub>esv</sub> and the NAD<sup>+</sup>-bound form of POS5 are shown in orange and cyan, respectively. The tryptophan W427 and arginine R430 and the equivalent residues in yeast POS5 (F400 and F404) are shown in stick.

(E) Zoom in the region of the C-tail of hsNADK, highlighting the positions of the bound NAD<sup>+</sup> molecules and conserved functionally important residues (W427, R430) that are visible in the cryoEM structures of hsNADK. The protein is shown as grey ribbons while the NAD<sup>+</sup> and the side-chains of W427 and R430 are shown in orange sticks. The electron density from hsNADK<sub>esv</sub>-NAD<sup>+</sup> is shown in orange surface.

(F) Hybrid model of C-tail of hsNADK. Zoom in the region of C-tail of hsNADK highlights the positions of conserved functionally important residues (W427, R430, Q433, and F436). The C-tail predicted by AlphaFold was slightly reoriented to fit into the residual density of hsNADK<sub>FL</sub>-apo. The C-terminal helix and tail are shown in dark-green ribbons, while the hybrid model is in blue ribbons. The extra electron density from hsNADK<sub>FL</sub>-apo is shown in cyan surface. Panels A-F are drawn using PyMOL.



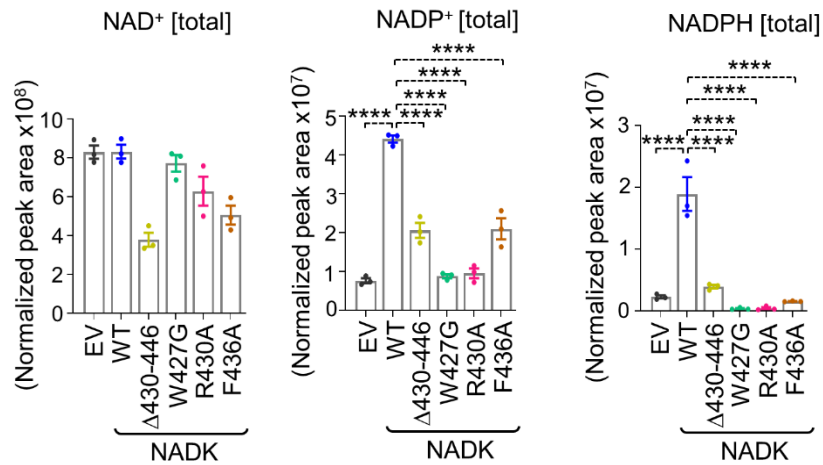

**Fig. S8. Effects of the C-terminal NADK mutations on cellular NAD(P)(H) pools.**

Normalized peak areas showing total NAD<sup>+</sup>, NADP<sup>+</sup>, and NADPH pools from NADK-deficient HEK-293 cells expressing either empty vector (EV) or the indicated NADK variants (WT, Δ430-446, W427G, R430A, and F436A). All the data are shown as the mean ± S.E.M. of biological triplicates from at least two independent experiments. \*\*\*\*p < 0.0001 was calculated with one-way ANOVA and Sidak Post-hoc test.

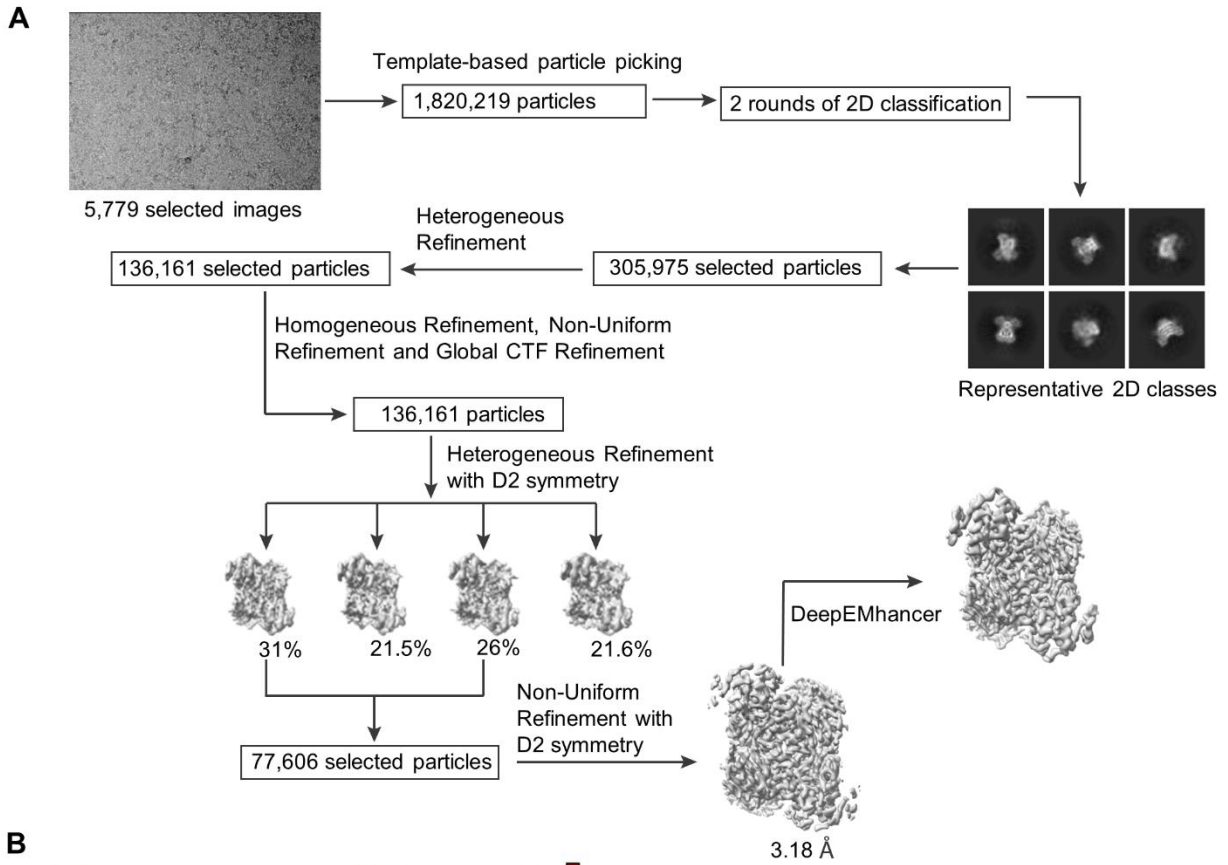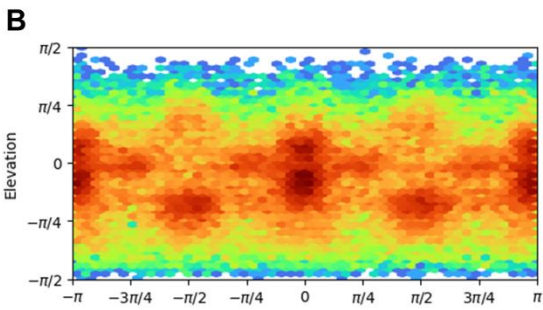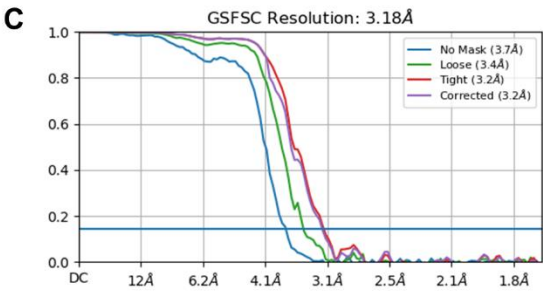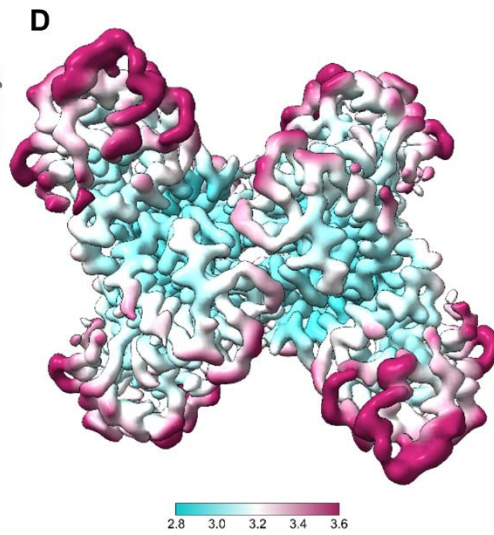

**Figure S9: Cryo-EM image processing for NADK<sub>FL</sub>.**

(A) Flowchart of the cryo-EM data processing of NADK<sub>FL</sub>.

(B) The Euler angle distribution plot from cryoSPARC.

(C) The gold-standard Fourier shell correlation (GS-FSC) curves from cryoSPARC.

(D) Local resolution estimation of the cryo-EM map of NADK<sub>FL</sub>.

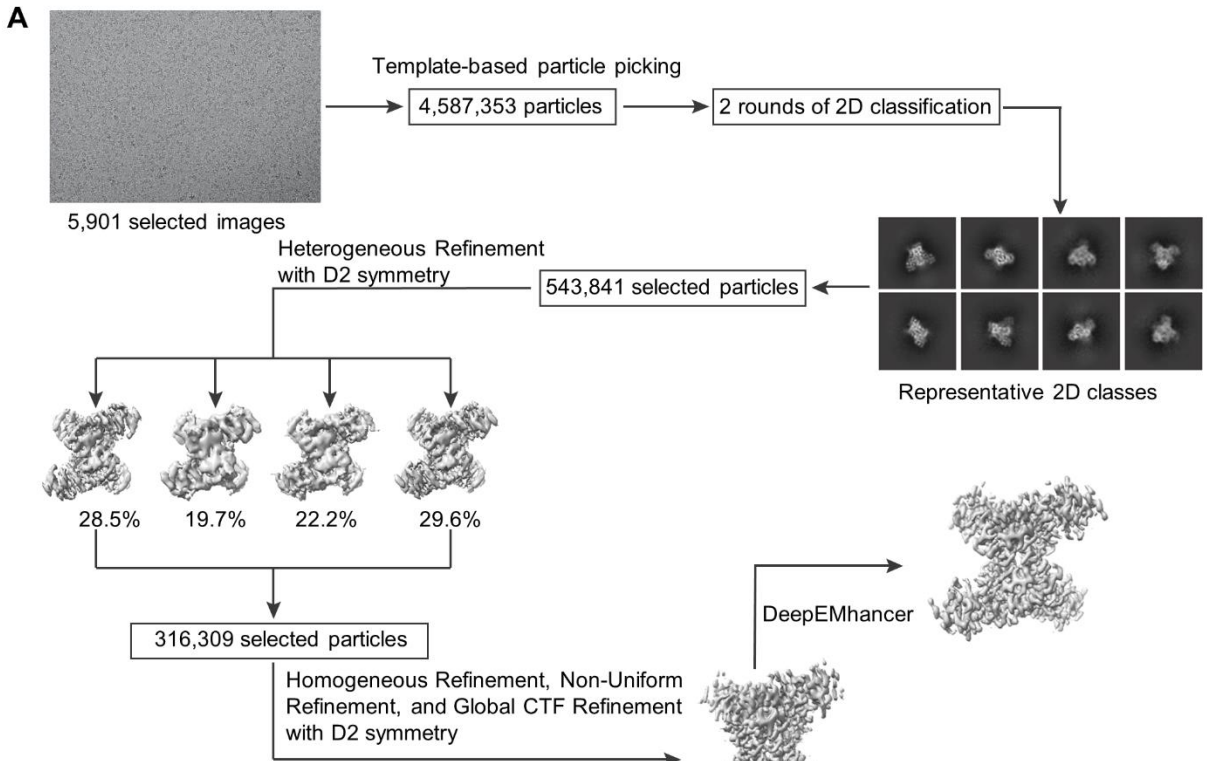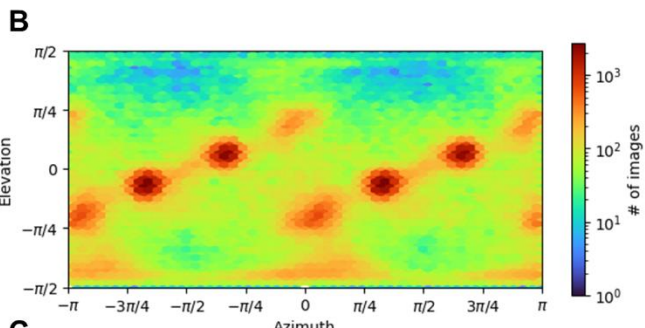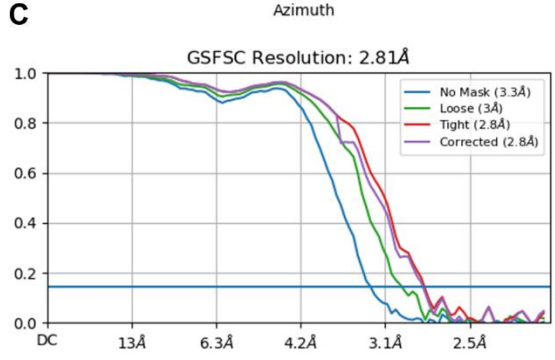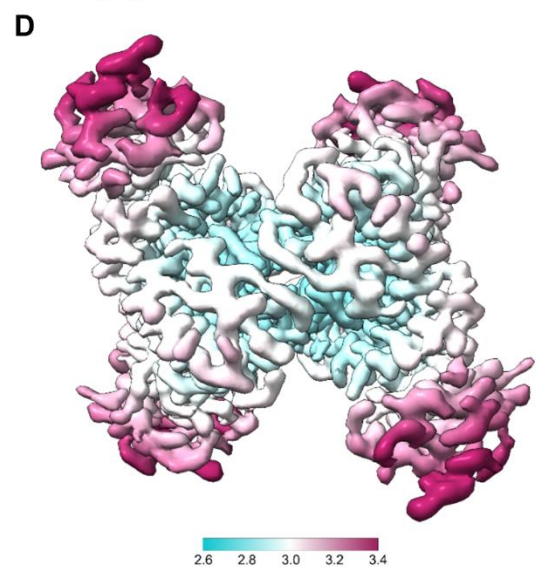

**Figure S10: Cryo-EM image processing for NADK<sub>esv</sub>.**

(A) Flowchart of the cryo-EM data processing of NADK<sub>esv</sub>.

(B) The Euler angle distribution plot from cryoSPARC.

(C) The gold-standard Fourier shell correlation (GS-FSC) curves from cryoSPARC.

(D) Local resolution estimation of the cryo-EM map of NADK<sub>esv</sub>.

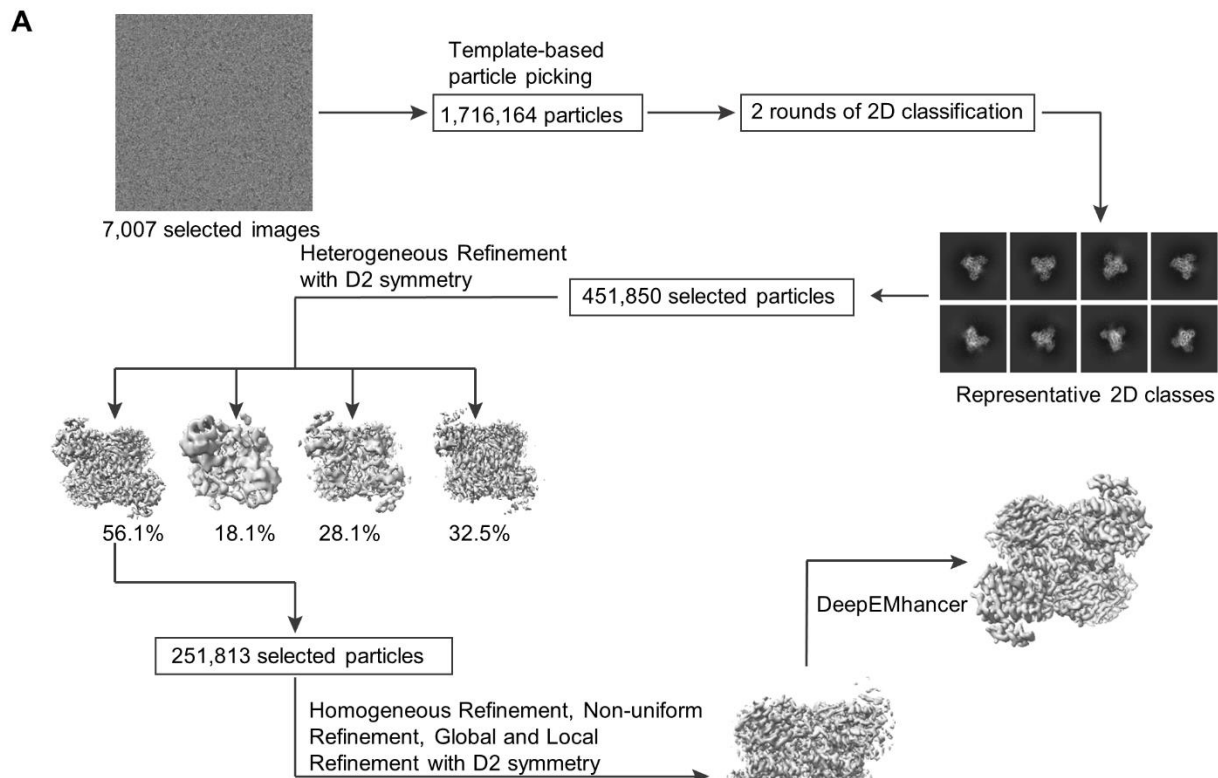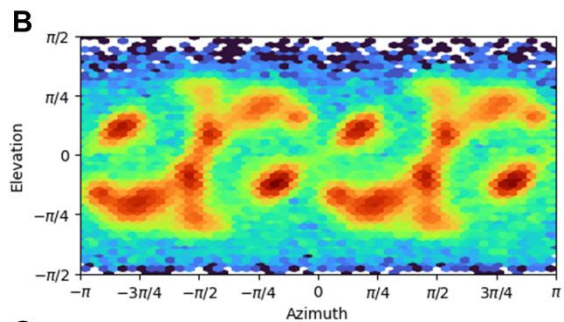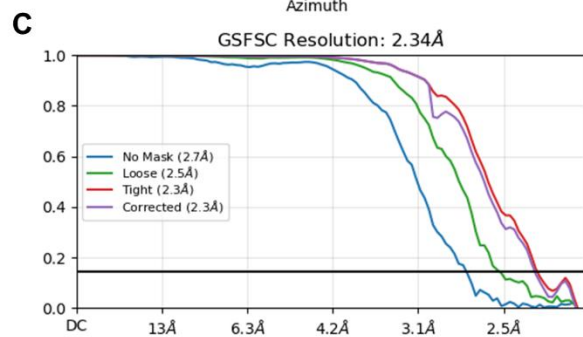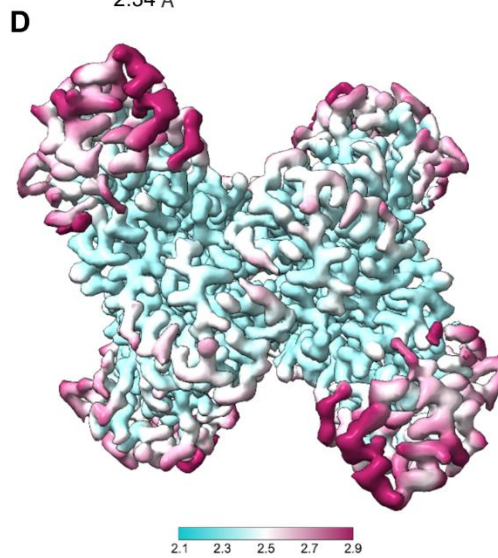

**Figure S11: Cryo-EM image processing for NADK<sub>esv</sub>-NAD<sup>+</sup>.**

(A) Flowchart of the cryo-EM data processing of NADK<sub>esv</sub>-NAD<sup>+</sup>.

(B) The Euler angle distribution plot from cryoSPARC.

(C) The gold-standard Fourier shell correlation (GS-FSC) curves from cryoSPARC.

(D) Local resolution estimation of the cryo-EM map of NADK<sub>esv</sub>-NAD<sup>+</sup>.
